# Supplementary material for: Spatial heterogeneity of GHG dynamics across an estuarine ecosystem
Source: Copernicus journal article supplement (doi:10.5194/egusphere-2025-5068), 2025-10-23
Supplement: Supplementary file [file egusphere-2025-5068-AC1-supplement.pdf]

### Reviewer n°3

#### Overview:

The manuscript „Spatial heterogeneity of GHG dynamics across an estuarine ecosystem” presents a nice data set of GHG data and related variables in an estuarine ecosystem in the northern Baltic Sea. The data set presents a spatial distribution within the onset of the of the salinity gradient, however, it represents just the late summer period. Nevertheless, the data set included next to the CO<sub>2</sub>, Methan and N<sub>2</sub>O as well. The main findings are that the estuarine system is heterogeneous, sinks and sources were found for CO<sub>2</sub> and N<sub>2</sub>O, but methane were supersaturated in all samples and were emitted to the atmosphere.

The manuscript is well written and relatively easy to follow, even if you are not familiar with the study site. Although it is known that the coastal waters and estuaries are important for the GHG balance, comprehensive data set with all three most important GHG are still rare, and they are needed to understand these quite heterogeneous contributions.

#### Major comments:

If next to CO<sub>2</sub> and Methane also N<sub>2</sub>O is included to understand the interaction between these three GHGs, it would be good to introduce next to the Carbon cycle also the Nitrogen Cycle and the interaction between them. At some points the mentioning of N<sub>2</sub>O not good connected.

→ We modified the introduction. We can now read starting at L 65:

“N<sub>2</sub>O is primarily produced via nitrification (ammonia oxidation) and denitrification (nitrate reduction) in sediments and water columns and is controlled by the availability of dissolved inorganic nitrogen and oxygen (Bange 2006). Eutrophication and hypoxia, often driven by excess nutrient and organic matter inputs, have been shown to promote N<sub>2</sub>O emissions (Murray et al., 2015; Brase et al., 2017). Coastal ecosystems are recognized as significant sources of N<sub>2</sub>O to the atmosphere (Bange, 2006; Cheung et al., 2025; Resplandy et al., 2024), where denitrification, especially in sediments and on particles, often dominates N<sub>2</sub>O production, even in well-oxygenated waters (Wan et al., 2023). However, coastal estimates remain uncertain due to sparse measurements and high spatial heterogeneity (Wan et al., 2023).”

One important variable to understand N<sub>2</sub>O production and emissions is next to the oxygen supply the availability of nitrate and the other DIN, as the authors mentioned in the discussion. Can you present also at least nitrate concentrations and include them in the correlation matrix?

→ Unfortunately, we did not measure nitrate and other DIN during our sampling. Some measurements were taken in the study area during similar times, but our sampling was not conducted at the same time and/or exact location, making it difficult to use them to improve the interpretation of the N<sub>2</sub>O data collected. Maybe our sentence was unclear; we modified it as follows:

L 257:

“Aalto et al. (2021) reported that higher N<sub>2</sub>O concentrations were associated with higher nitrate concentrations and inputs of allochthonous carbon, while lower N<sub>2</sub>O concentrations were associated with efficient internal recycling of N.”

L 355:

“Spatial variability of N<sub>2</sub>O mirrors the findings of Aalto et al. (2021), who linked higher N<sub>2</sub>O concentrations near the Karjaanjoki River to higher nitrate inputs and allochthonous carbon inputs.”

Somewhere in the manuscript the authors must explain what the potential sinks for N<sub>2</sub>O are and present an explanation for the undersaturation of the N<sub>2</sub>O. Do you assume that N<sub>2</sub>O is consumed under anaerobic conditions in the sediments? Are the also processes in the water column which consumed N<sub>2</sub>O.

→ The lack of nitrate measurements associated with our observations makes it difficult to explain the observed trend, but a study by Aalto et al. (2021) from the same area, along the same salinity gradient, suggested that sites located in the ‘offshore archipelago,’ where autochthonous (locally produced, e.g., phytoplankton-derived) organic matter is more common and nitrate concentrations are lower, promote DNRA as the main pathway for recycling nitrate to ammonium without producing N<sub>2</sub>O. This process acts as a sink by suppressing N<sub>2</sub>O formation. They also suggest that complete denitrification occurred in environments with a high organic carbon-to-nitrate ratio, such as those with abundant autochthonous organic matter.

We modified our manuscript and can now read from L 353:

“Spatial variability of N<sub>2</sub>O mirrors the findings of Aalto et al. (2021), who linked higher N<sub>2</sub>O concentrations near the Karjaanjoki River to higher nitrate inputs and allochthonous carbon inputs. They suggested that the ratio between nitrate and autochthonous organic carbon controls the balance between N-removing denitrification and N-recycling through Dissimilatory Nitrate Reduction to Ammonium (DNRA), as well as the end-product of denitrification (Aalto et al., 2021). Within the archipelago, where riverine influence is limited, DNRA can produce significant amounts of bioavailable ammonium, enhancing nitrogen recycling between sediments and surface water, especially in summer, when autochthonous biomass production and sedimentation are highest.”

The aim of the study which is formulated at the end of the introduction seems to be a bit too ambiguous. I would suggest orientating the aims a bit more on the structure of the discussion section.

→ We rephrased the last chapter of the introduction (L 77). It now reads:

“We investigate the dynamics of CO<sub>2</sub>, CH<sub>4</sub>, and N<sub>2</sub>O (GHGs) along a salinity gradient and across contrasting coastal habitats within an estuary. We combined detailed field measurements of surface seawater physical and biogeochemical properties with both in situ measurements and calculated estimates of air–sea GHG exchange. This approach allowed us to capture spatial variability and discuss the roles of physical drivers and biological processes in the observed changes in GHG concentrations. In doing so, we aim to estimate the contribution of coastal ecosystems to GHG emissions and provide additional data that may be useful in improving global estimates of GHG emissions from the coastal ocean.”

The explanation of the importance of the sediments for the GHG production, without having direct measurements comes a bit out of the blue and contradicts the hypotheses that the GHGs are mainly just mixed from the river inputs.

→ We have tuned down the importance of the sediments for GHG production, as we don’t have direct measurements. In the new section 4.3 Exposed and semi-sheltered vs sheltered sites, we can read at L 338:

“Freshwater mixing with seawater appears to control the concentration of all three GHGs at exposed and semi-sheltered sites, as much of the variability in surface seawater concentrations can be explained by salinity. In sheltered sites of the archipelago, deviations from the salinity-driven pattern indicate the influence of additional processes.”

Further down, L 349, we can read:

“Anoxic degradation of organic-rich sediments (methanogenesis), exacerbated by warm late-summer waters (Roth et al., 2022; Yvon-Durocher et al., 2014), combined with short water residence times that limit oxidation in both sediment and the overlying water column (Reeburgh, 2007), creates favourable conditions for CH<sub>4</sub> production. Due to the sheltered nature of the sites and limited water exchange, the produced CH<sub>4</sub> can accumulate. Similarly, enhanced respiration of organic carbon in shallow ecosystems elevates CO<sub>2</sub> concentrations (Humborg et al., 2019).”

Some specific / minor comments:

Abstract: quite too long and can be more focused.

→ We tried to shorten it, taking into consideration comments from other reviewers.

L21: N<sub>2</sub>O is missing

→ We are not sure about what the reviewer is referring to.

L 21 reads: “CH<sub>4</sub> concentrations were consistently supersaturated (19 to 469 nmol L<sup>-1</sup>) compared to the atmosphere, resulting in a net source to the atmosphere from 0.014 to 1.39 mmol m<sup>-2</sup> d<sup>-1</sup>. ”

This sentence is not related to N<sub>2</sub>O, and the previous sentence clearly refers to both CO<sub>2</sub> and N<sub>2</sub>O.

L 28: Is Methane always a source and N<sub>2</sub>O a sink?

→ The sentence has been changed as follows: “The overall budget of air–sea GHG exchanges was dominated by CO<sub>2</sub> fluxes, with CH<sub>4</sub> consistently acting as a source, and N<sub>2</sub>O alternating between source and sink.”

L64. There is some literature that N<sub>2</sub>O production and Oxygen depletion correlated, e.g. in the Elbe Estuary

→ We modified this section; see earlier response, where we mentioned studies on N<sub>2</sub>O dynamics in the Elbe Estuary.

L 88: What are soft-sediment habitats

→ The sentence now reads (L 93):

“Sampling sites (N = 21) were selected to encompass a wide range of soft-sediment habitats (e.g., including both vegetated and non-vegetated sediments with grain size ranging from coarse sand to clay, silt, and mud) and to represent a spatial gradient (50 km) from the outer to innermost archipelago.”

L100. What was the partial sampling strategy? From fresh to salty? Each Stations just once, how much on one day....

→ We added the following precision (L 110):

“Sites were visited once during the study period, with sampling conducted every two to three days, depending on weather conditions and boat availability.”

L231: Did you measure DIN (Nitrate, ...)

→ Unfortunately, we did not measure nitrate and other DIN during our sampling. Some measurements were taken in the study area during similar times, but our sampling was not conducted at the same time and/or exact location, making it difficult to use them to improve the interpretation of the N<sub>2</sub>O data collected.

L 306 ff. Here comes the main concrete results of the manuscript that can be one new chapter

→ We have not split section “4. Discussion” into four subsections:

4.1. Salinity gradient

4.2 Biological driver

4.3 Exposed and semi-sheltered vs sheltered sites (the new chapter as requested)

4.4 Air-sea flux densities
